# Supplementary material
Source: PubMed Central journal article supplement (PMC2932622)
Supplement: 1009386107_pnas.1009386107_SI.pdf [file 1009386107_pnas.1009386107_SI.pdf]

# Supporting Information

Vander Kooi et al. 10.1073/pnas.1009386107

SI Text

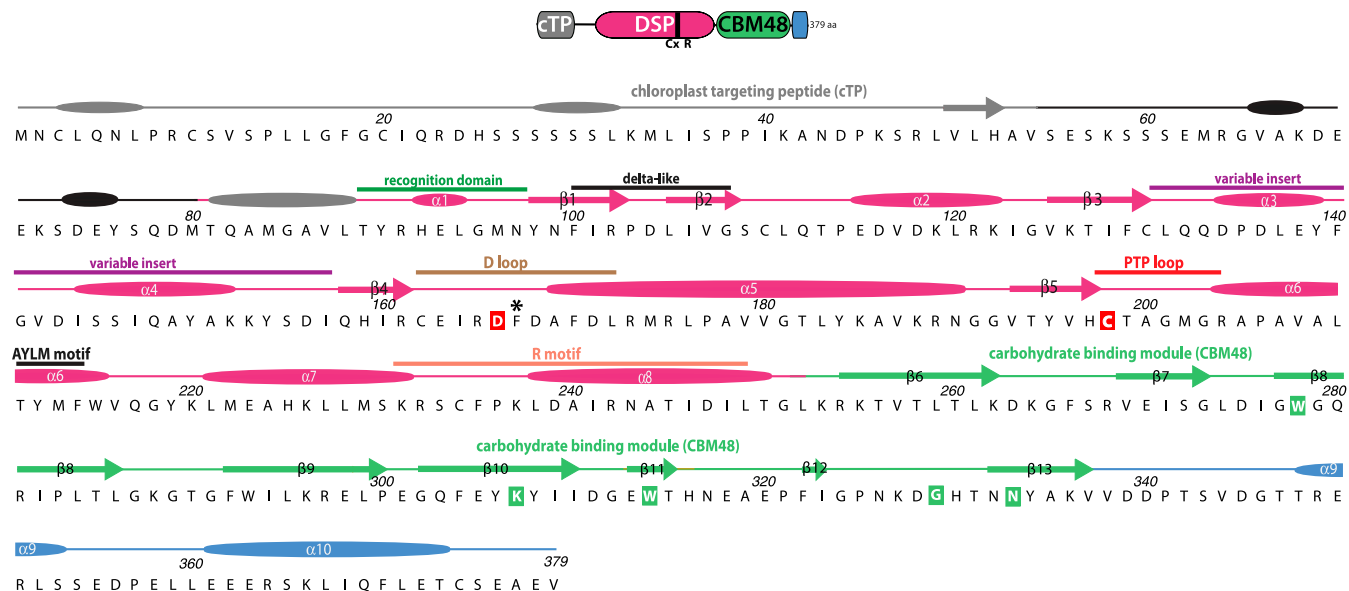

**Fig. S1.** Schematic of *A. thaliana* SEX4 depicting the domain topography and secondary structure of chain A in the asymmetric unit. The chloroplast targeting peptide (cTP) is gray, the dual specificity phosphatase (DSP) domain is pink, the carbohydrate binding module family 48 (CBM48) is green, the C-terminal domain is blue, and linker regions are black. The different subdomains within the DSP domain are labeled per standard nomenclature (33).  $\alpha$ -helices and  $\beta$ -sheets within the DSP domain are numbered 1–8 and 1–5, respectively, the  $\beta$ -sheets within the CBM are numbered 6–13, and the  $\alpha$ -helices in the C-terminal domain 9–10. The active site cysteine (C198) and aspartic acid (D166) are highlighted by a red box. F167 is highlighted by an asterisk. Residues known to disrupt binding to glucans are highlighted with a green box.

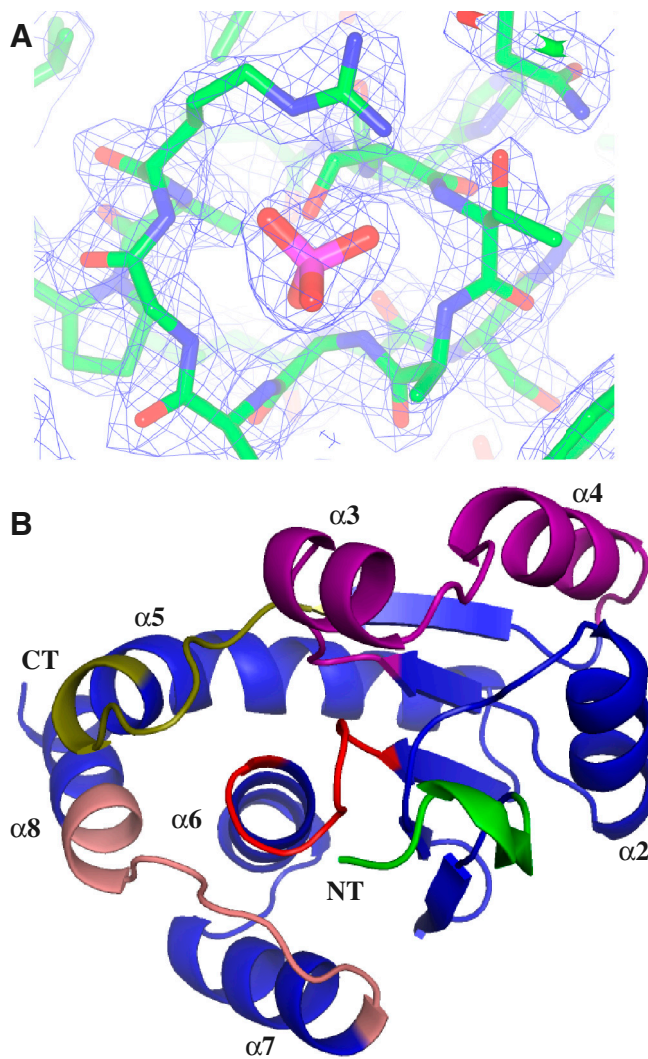

Fig. S2. DSP domain structure. (A) The phosphatase active site P-loop of SEX4 including bound phosphate ion (pink and red) shown with 2Fo-Fc electron density map contoured at  $1.6\sigma$ . (B) The DSP domain of SEX4 displayed in the classical orientation and with each subdomain colored. Green, recognition domain; purple, variable insert; beige, D-loop; red, active site; salmon, R-motif.

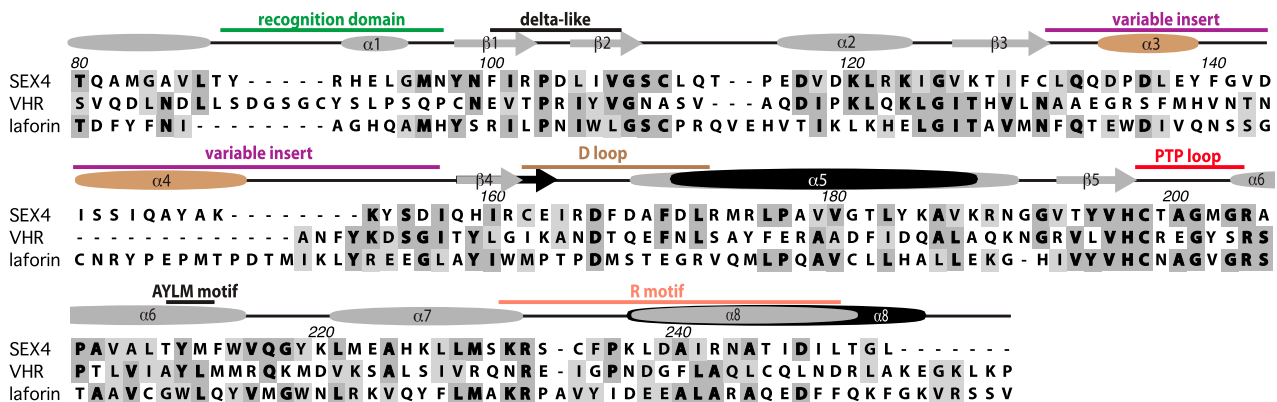

Fig. S3. Multiple sequence alignment of the DSP domain of *A. thaliana* SEX4, *H. sapiens* VHR, and *H. sapiens* laforin. Numbering refers to the amino acids of SEX4. The different subdomains within the DSP domain are labeled per standard nomenclature (33). SEX4 secondary structure is displayed in gray.  $\alpha$ -helices 3 and 4 are in tan because they are shared between SEX4 and the predicted secondary structure of laforin. The black  $\alpha$ -helices and  $\beta$ -sheet are predicted secondary elements of laforin and VHR.

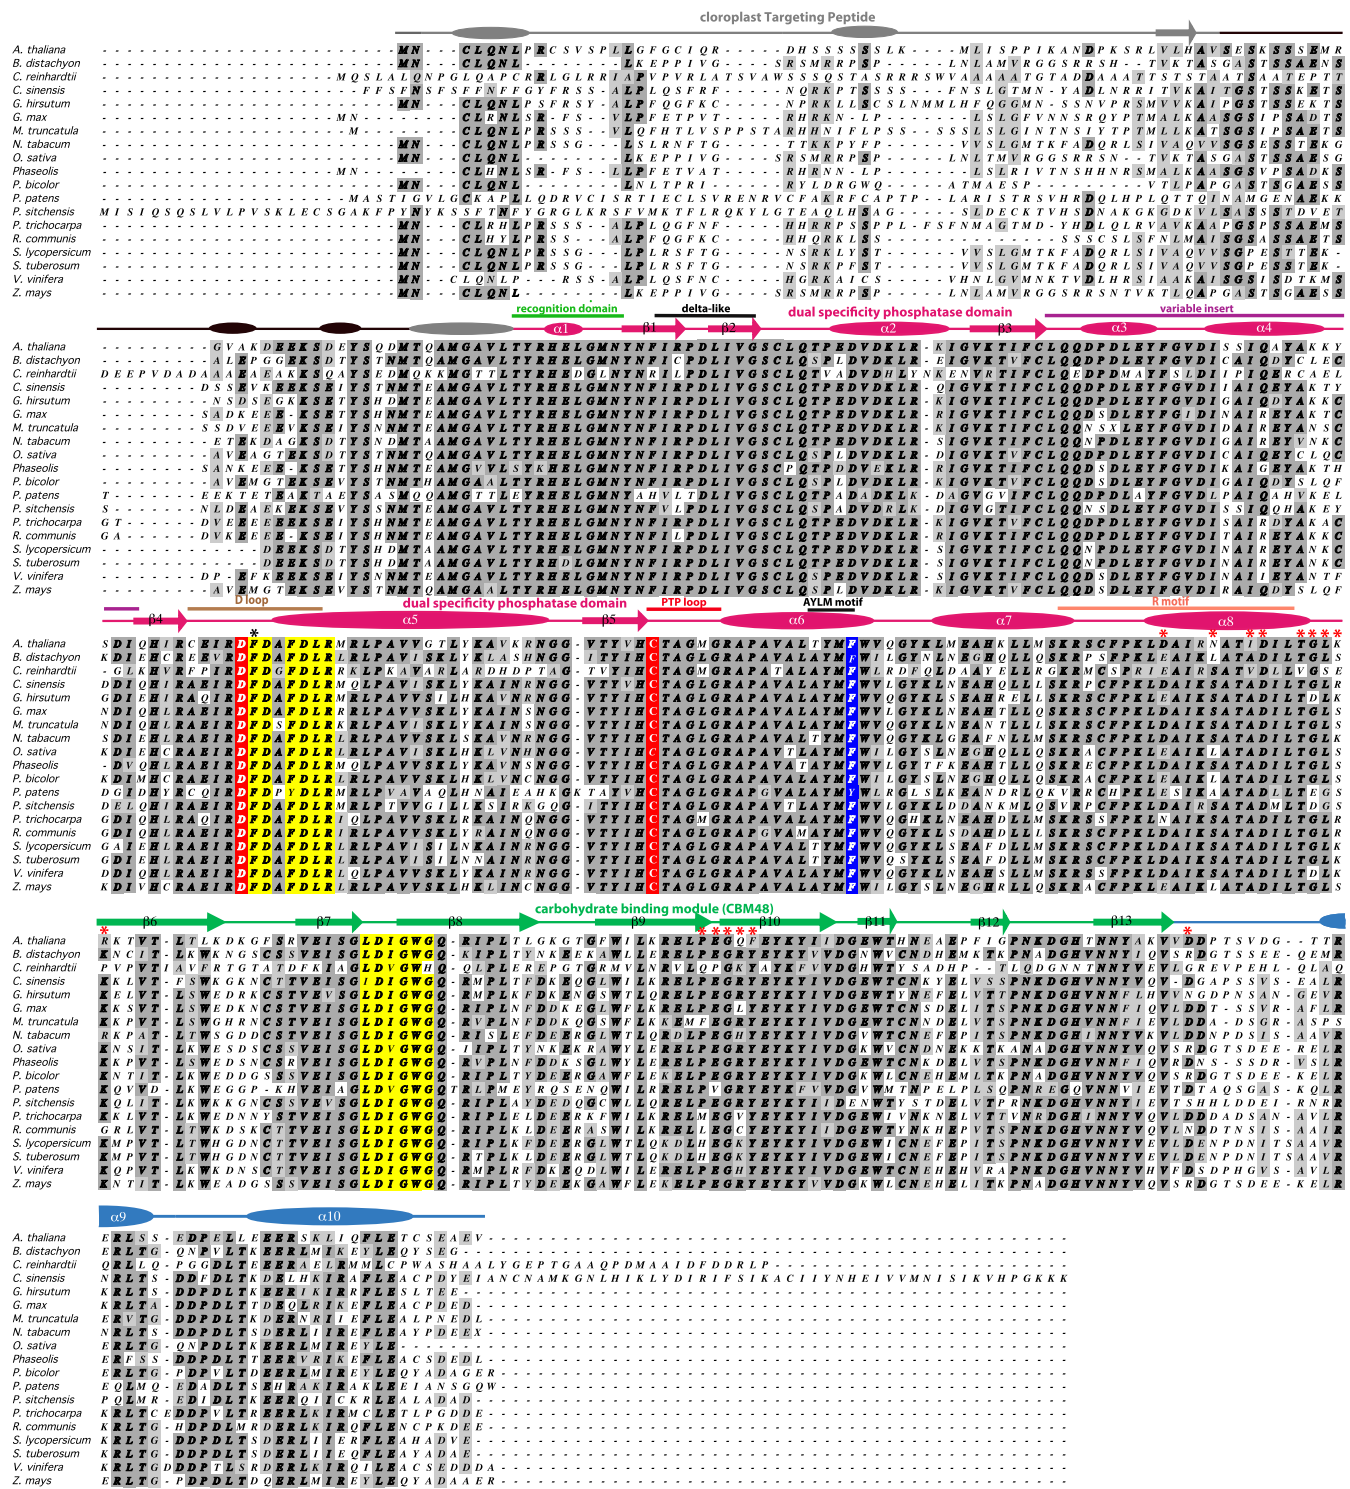

**Fig. 54.** Multiple sequence alignment of SEX4 orthologs. Secondary structure and elements are labeled as in Fig. S1. The catalytic residues D166 and C198 are boxed in red. F167 is marked with a black asterisk. F214 within the AYLM motif is boxed in blue. The  $\alpha 5$  region of the DSP and the  $\beta 7/8$  loop of the CBM that pack together are both boxed in yellow. Residues within  $\alpha 8$  of the DSP domain that pack against  $\beta 10$  and the end of the CBM are all marked with red asterisks.

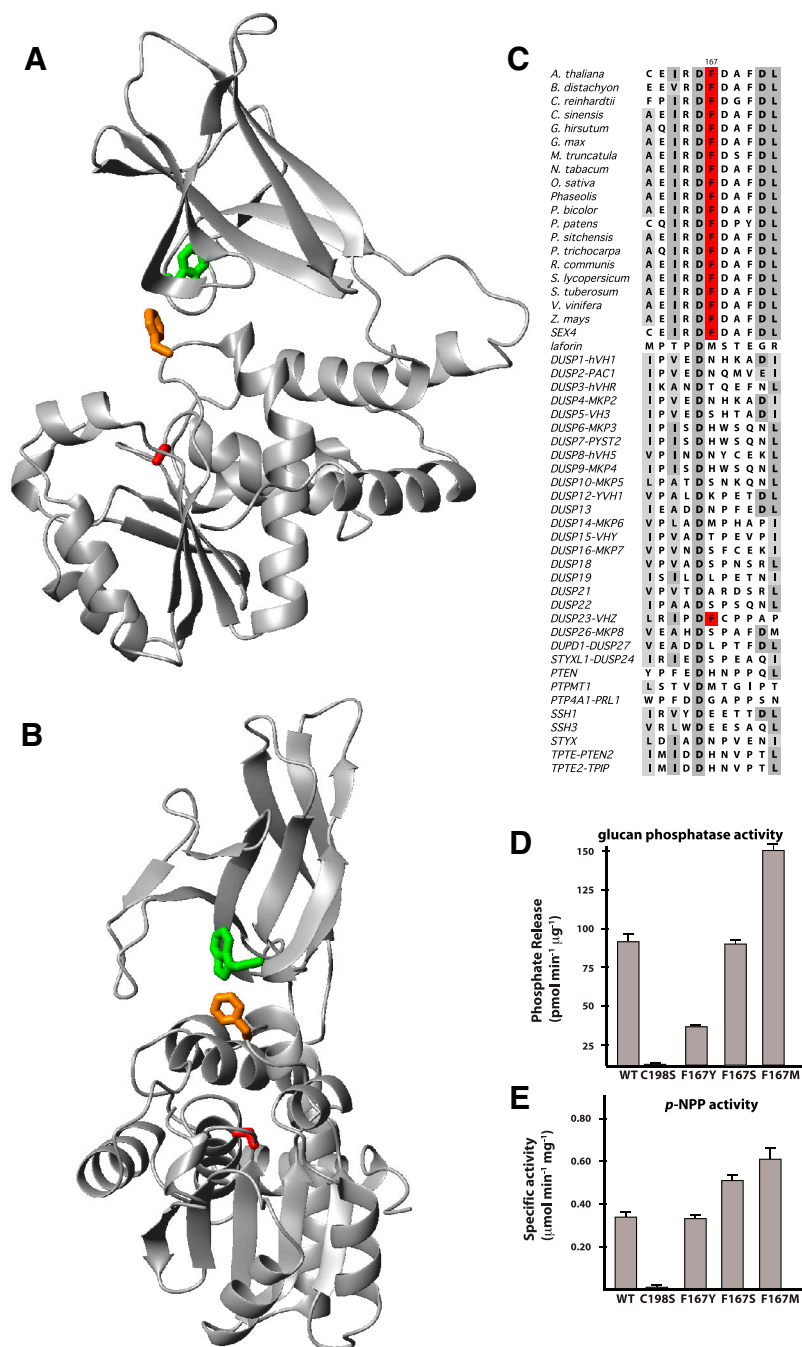

**Fig. S5.** F167 is critical for SEX4 function as a glucan phosphatase. (A) Ribbon diagram of SEX4 (residues 90–379) with the active site S198 labeled with a red stick, F167 in yellow, and W278 in green. This is the same view as in Fig. 1C. (B) Ribbon diagram as in B but rotated 90°. This is the same orientation as the zoom in Fig. 4A. (C) Multiple sequence alignment of the D-loop of SEX4 orthologs and multiple DSPs. (D) Release of phosphate by  $\Delta$ 89-SEX4 (WT) and SEX4 mutants utilizing the specific glucan substrate amylopectin. Error bars indicate means  $\pm$  the standard deviation. (E) Specific activity of  $\Delta$ 89-SEX4 (WT) and SEX4 mutants against the generic substrate *p*-NPP.

**Table S1. Percent similarity and identity of SEX4 orthologs to *A. thaliana* SEX4 full-length protein (At-SEX4), the DSP domain (At-SEX4 DSP), and the CBM (At-SEX4 CBM48) (similarity/identity)**

|                        | At-SEX4 | At-SEX4 DSP | At-SEX4 CBM48 |
|------------------------|---------|-------------|---------------|
| <i>A. thaliana</i>     | 100/100 | 100/100     | 100/100       |
| <i>B. distachyan</i>   | 68/57   | 86/75       | 71/57         |
| <i>C. reinhardtii</i>  | 49/34   | 71/56       | 52/34         |
| <i>C. sinensis</i>     | 64/54   | 93/86       | 76/64         |
| <i>G. hirsutum</i>     | 73/62   | 93/86       | 76/62         |
| <i>G. max</i>          | 72/60   | 90/83       | 74/65         |
| <i>M. truncatula</i>   | 71/58   | 89/81       | 71/57         |
| <i>N. tabacum</i>      | 73/64   | 90/85       | 68/62         |
| <i>O. sativa</i>       | 67/57   | 89/77       | 66/55         |
| <i>Phaseolis spp.</i>  | 71/59   | 86/77       | 74/62         |
| <i>P. bicolor</i>      | 68/58   | 87/77       | 70/62         |
| <i>P. patens</i>       | 56/42   | 72/60       | 63/43         |
| <i>P. sitchensis</i>   | 61/48   | 88/75       | 67/57         |
| <i>P. trichocarpa</i>  | 73/61   | 92/83       | 70/62         |
| <i>R. communis</i>     | 73/63   | 93/82       | 72/68         |
| <i>S. lycopersicum</i> | 73/62   | 89/83       | 71/60         |
| <i>S. tuberosum</i>    | 73/62   | 89/82       | 71/60         |
| <i>V. vinifera</i>     | 71/60   | 91/83       | 72/65         |
| <i>Z. mays</i>         | 68/57   | 87/76       | 68/60         |
